# Supplementary material for: Realization of Daily Evapotranspiration in Arid Ecosystems Based on Remote Sensing Techniques
Source: Copernicus journal article supplement (doi:10.5194/gi-2016-40), 2016-12-08
Supplement: Supplementary file [file gi-2016-40-RC2-supplement.pdf]

## Review- gi-2016-40

Dear Author,

- I found some mistakes related to references which are used in the paper. They are below:
  1. In the page 2 (line number 33) the reference was written as **Batiaanssen et al.,1998** but in the references section **Batiaanssen et al.,1998b** Which is the correct one?
  2. In the page 2 (line number 49)the reference was written as **Crago et al.,2005** but in the references section **Crago and Crowley,2005** Which is the correct one?
  3. In the page 2 (line number 60) the reference **Hurk and Holtslag (1995)** was used in the text but it wasn't in the references section. Please check it.
  4. In the page 6 (line number 119) the references **Monteith, 1965 and 1981** were used in the text but they weren't in the references section. Please check it.
  5. In the page 7 (line number 152) the references **Liu and Wang, 1999** was used in the text but it wasn't in the references section. Please check it.
  6. In the page 7 (line number 154) the references **Taylor, 1981** was used in the text but it wasn't in the references section. Please check it.
  7. In the page 8 (line number 156) the references **Jensen et al.,1990** was used in the text but it wasn't in the references section. Please check it.
  8. In the page 8 (line number 173) the references **Allen et al.,1998** was used in the text but it wasn't in the references section. Please check it.
  9. In the page 10 (line number 211) the references **Liu and Wang, 1999** was used in the text but it wasn't in the references section. Please check it.
  10. In the page 10 (line number 218) the references **Frey et al.,2010** was used in the text but it wasn't in the references section. Please check it.
  11. In the page 10 (line number 221) the references **Li et al., 2009** was used in the text but it wasn't in the references section. Please check it.
  12. In the page 10 (line number 223) the references **Elhag, et al.,2013** have to corrected as **Elhag et al., 2011.**
  13. In the references section these references were written but they wasn't used in the text: **Bernstein et al., 2005; Loheide and Gorelick, 2005; Su et. al, 2010; Su et al., 2003; Tasumi et. al., 2006; Van den Hurk and Holstag, J995.** Please check them.
